# Supplementary material for: Upcycling of polyurethane waste by mechanochemistry: synthesis of N-doped porous carbon materials for supercapacitor applications
Source: publisher site journal article supplement (doi:10.3762/bjnano.10.157), 2019-08-06

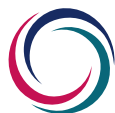

## Supporting Information

for

### **Upcycling of polyurethane waste by mechanochemistry: synthesis of N-doped porous carbon materials for supercapacitor applications**

Christina Schneidermann, Pascal Otto, Desirée Leistenschneider, Sven Grätz,  
Claudia Eßbach and Lars Borchardt

*Beilstein J. Nanotechnol.* **2019**, *10*, 1618–1627. doi:10.3762/bjnano.10.157

### **Materials and methods, additional figures and activation mechanism**

# Contents

|                                               |     |
|-----------------------------------------------|-----|
| S1 Materials and Methods.....                 | S3  |
| S2 Figures.....                               | S4  |
| S2.1 IR spectra .....                         | S4  |
| S2.2 XRD .....                                | S4  |
| S2.3 SEM .....                                | S5  |
| S2.4 TGA .....                                | S6  |
| S2.5 Dynamic contact angle measurements ..... | S7  |
| S2.6 Conductivity measurements .....          | S7  |
| S2.6 Electrochemical characterization .....   | S8  |
| S3 Activation mechanism.....                  | S10 |

## S1 Materials and Methods

The polyurethane foam was purchased from Soudal. Urea and  $\text{K}_2\text{CO}_3$  were purchased from Grüssing GmbH. All chemicals were used without further purification.

**Scanning electron microscopy (SEM)** was carried out using a Hitachi SU 8020 at a beam voltage of 2 kV.

**Thermogravimetric analysis (TGA)** was performed on a Netzsch STA 409 PC/PG system using alumina crucibles under argon stream with a heating rate of  $10\text{ }^\circ\text{C}\cdot\text{min}^{-1}$ .

**X-ray diffraction (XRD)** measurements were performed on a Xpert Pro from PANalytical using  $\text{Cu K}\alpha_1$  ( $\lambda = 1.54056\text{ \AA}$ ) radiation as five-fold determination in the  $2\theta$  range of  $5\text{--}70^\circ$  with a step width of 0.026. The received X-ray diffractograms were compared with the Inorganic Crystal Structure Database (ICSD) regarding position and intensity of the reflections.

## S2 Figures

### S2.1 IR spectra

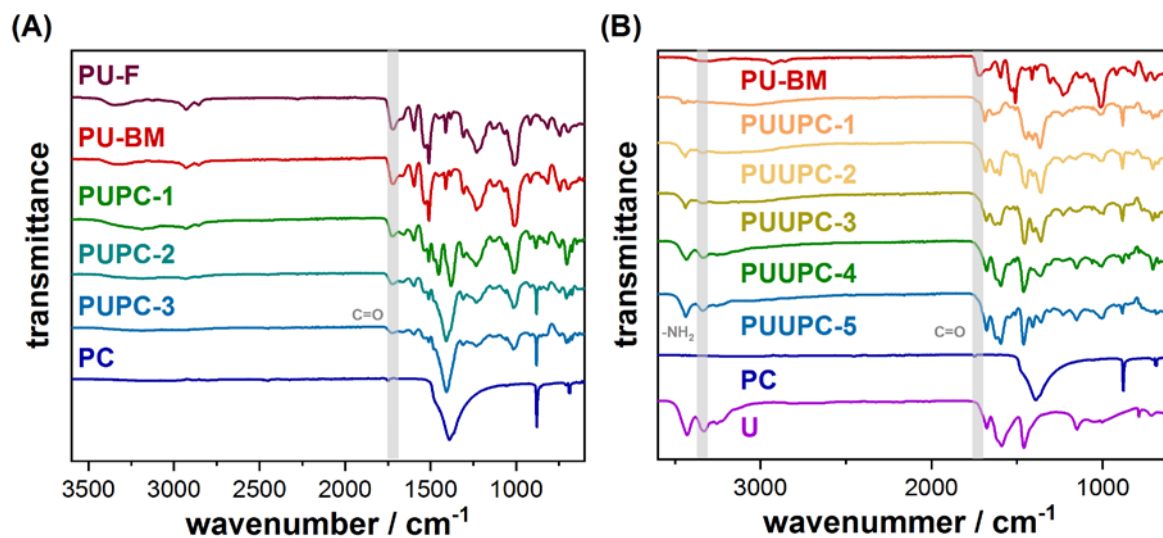

**Figure S1:** (A) Infrared-spectra of PU foam (PU-F) compared with PU ball-milled (PU-BM) with different amounts of  $K_2CO_3$  (PUPC) and (B) PU-BM compared with PU milled with different amounts of  $K_2CO_3$  and urea (PUUPC).

### S2.2 XRD

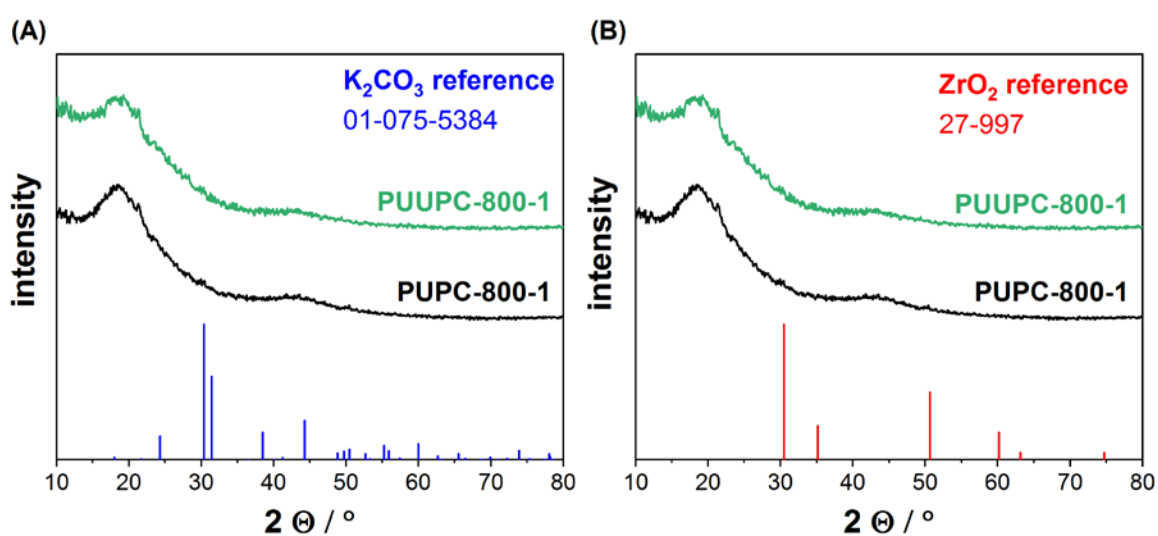

**Figure S2:** X-ray diffractograms of PUUPC-800-1 (green) and PUPC-800-1 (black) with  $K_2CO_3$  reference (A/blue) and  $ZrO_2$  reference (B/red).

## S2.3 SEM

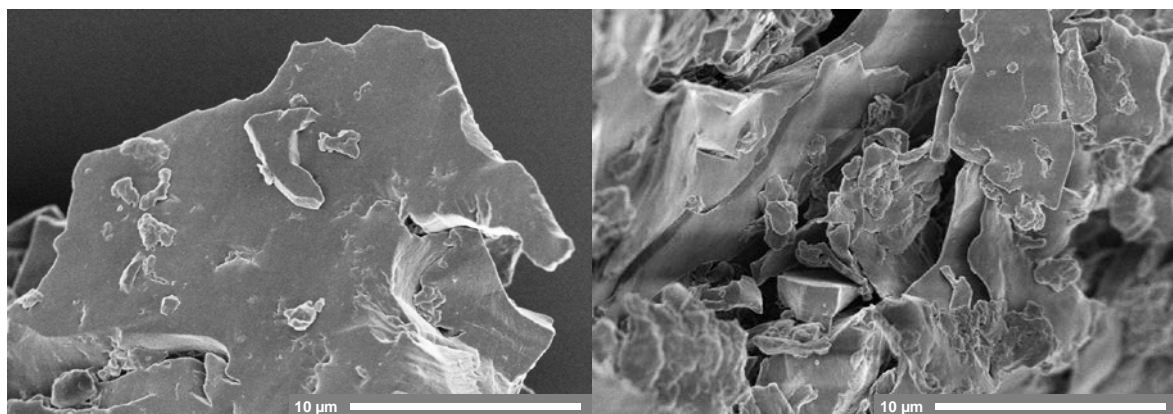

**Figure S3:** SEM images of PU-BM before pyrolysis.

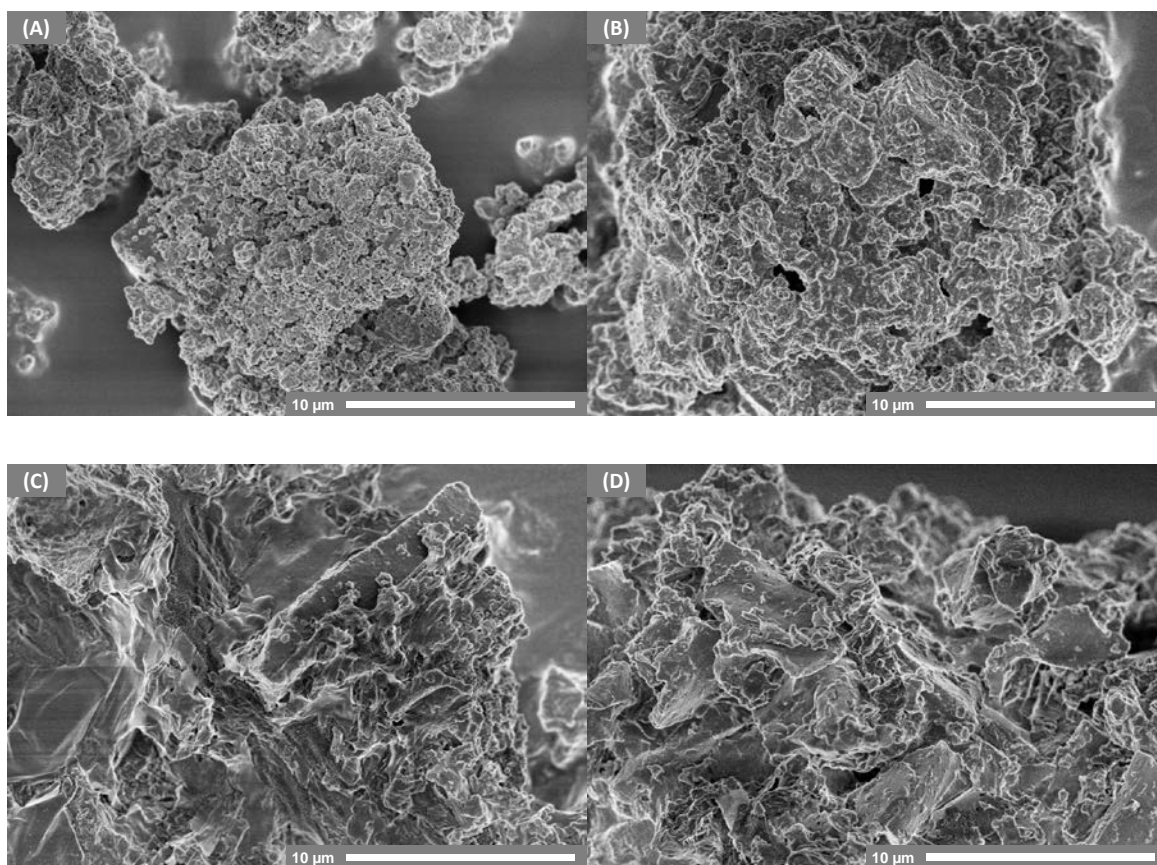

**Figure S4:** SEM pictures of PUPC-3 (A), PUUPC-1 (B), PUUPC-2 (C) and PUUPC-3 (D) before pyrolysis.

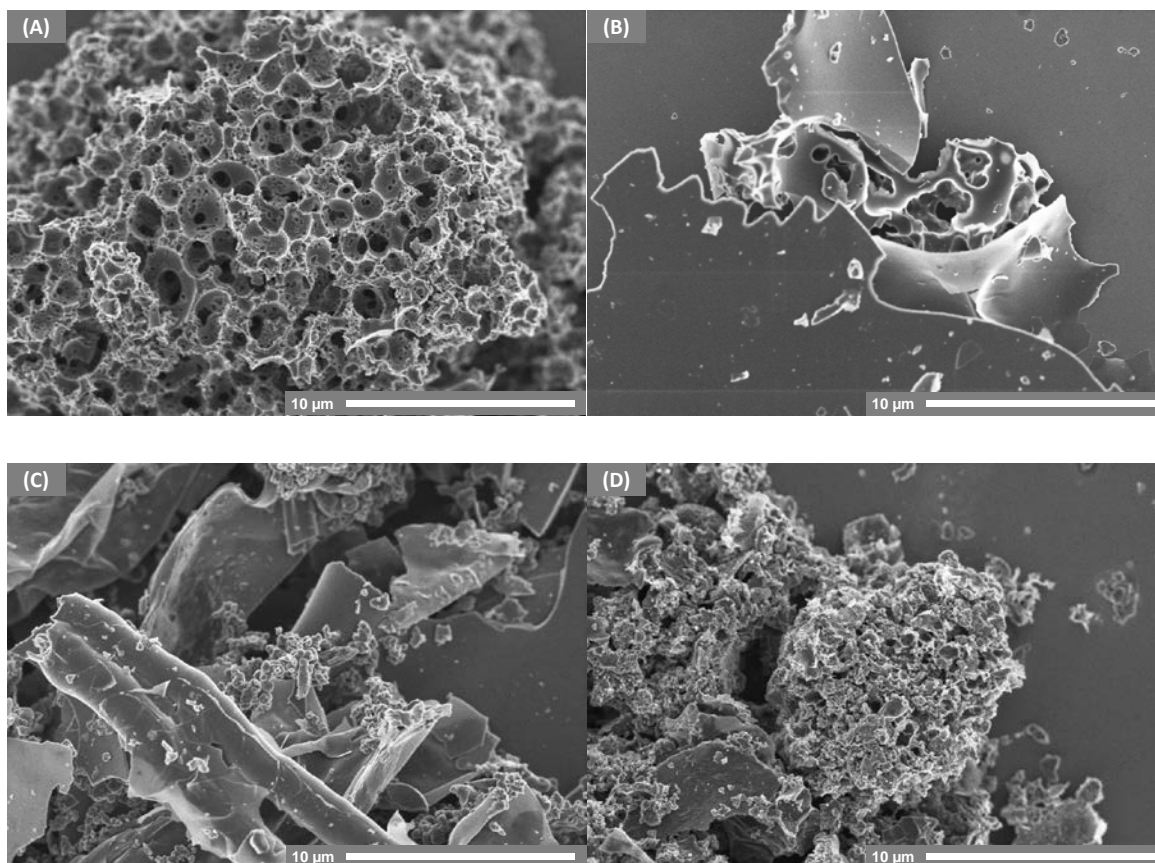

**Figure S5:** SEM pictures of the samples PUPC-3-800 (A), PUUPC-1-800 (B), PUUPC-2-800 (C) and PUUPC-3-800 (D).

## S2.4 TGA

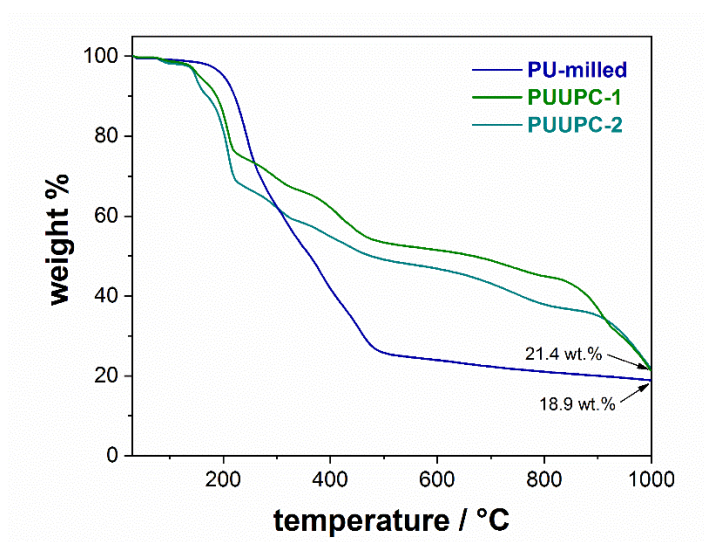

**Figure S6:** Thermogravimetric analysis of the samples PU-BM (blue), PUUPC-1 (green) and PUUPC-2 (cyan).

## S2.5 Dynamic contact angle measurements

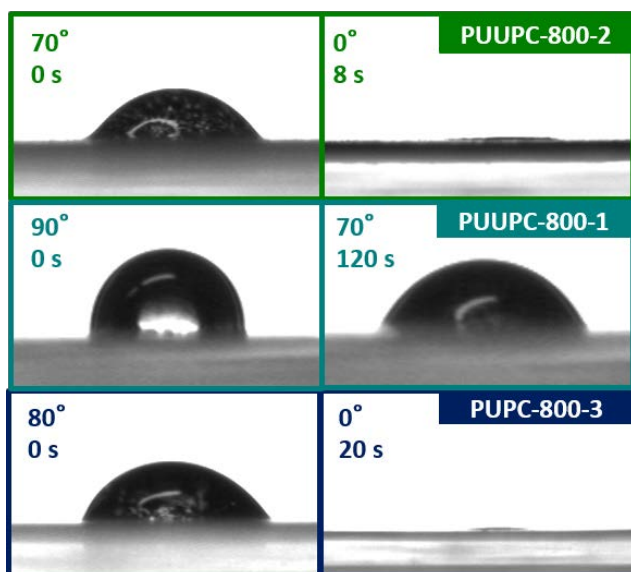

**Figure S7:** Dynamic contact angle measurements of the samples PUUPC-800-2 (green), PUUPC-800-1 (cyan) and PUPC-800-3 (blue).

## S2.6 Conductivity measurements

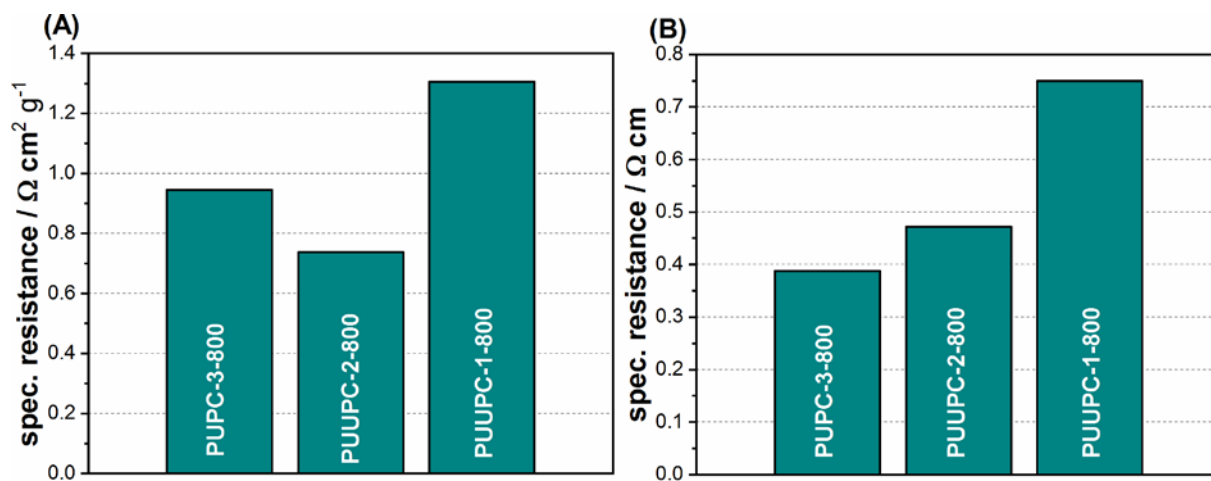

**Figure S8:** Powder conductivities. Gravimetric (A) and normalized (B) to the surface of electrode ( $d = 1 \text{ cm}$ ) for the samples PUPC-3-800, PUUPC-2-800 and PUUPC-1-800.



## S2.6 Electrochemical characterization

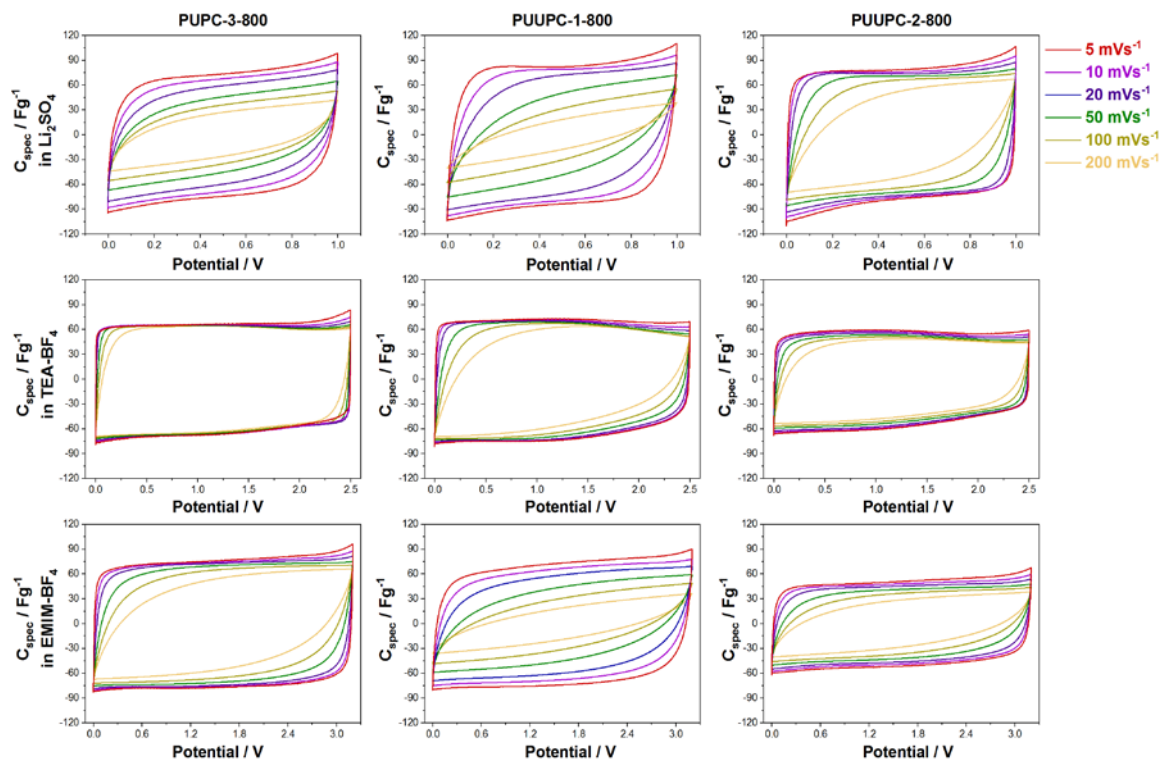

**Figure S9:** Cyclic voltammetry (CV) matrix of samples PUPC-3-800, PUUPC-1-800, and PUUPC-2-800 measured in aqueous electrolyte  $\text{Li}_2\text{SO}_4$ , organic electrolyte  $\text{TEA-BF}_4$  in ACN and ionic electrolyte  $\text{EMIM-BF}_4$ .



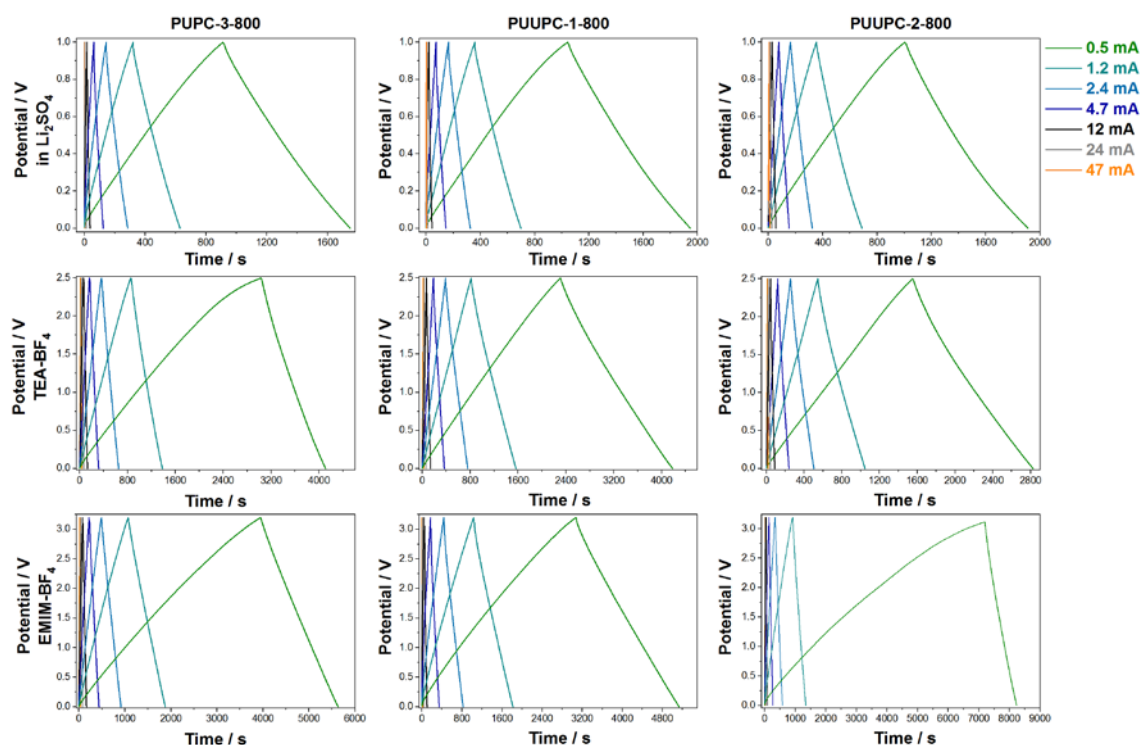

**Figure S10:** Galvanostatic cycling with potential limitation (GCPL) matrix of samples PUPC-3-800, PUUPC-1-800, and PUUPC-2-800 measured in aqueous electrolyte  $\text{Li}_2\text{SO}_4$ , organic electrolyte TEA- $\text{BF}_4$  in ACN and ionic electrolyte EMIM- $\text{BF}_4$ .

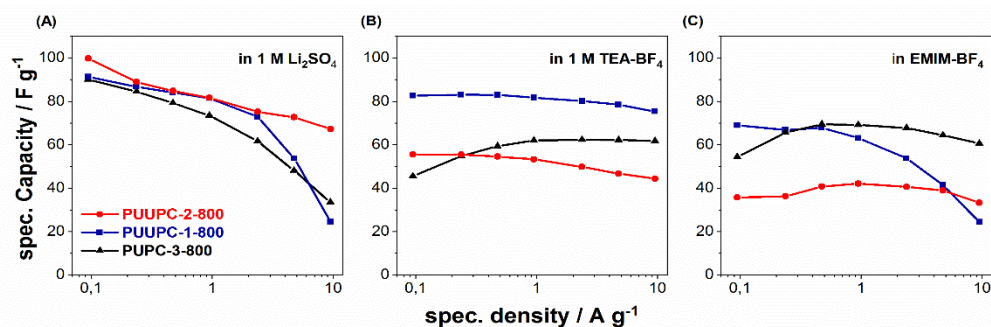

**Figure S11:** Galvanostatic charge-discharge rate handling plots at different specific current values of the samples PUUPC-800-1 (blue), PUUPC-800-2 (red) and PUPC-800-3 (black) in (A) aqueous  $\text{Li}_2\text{SO}_4$  electrolyte, (B) organic TEA- $\text{BF}_4$  in ACN and (C) ionic liquid EMIM- $\text{BF}_4$ .

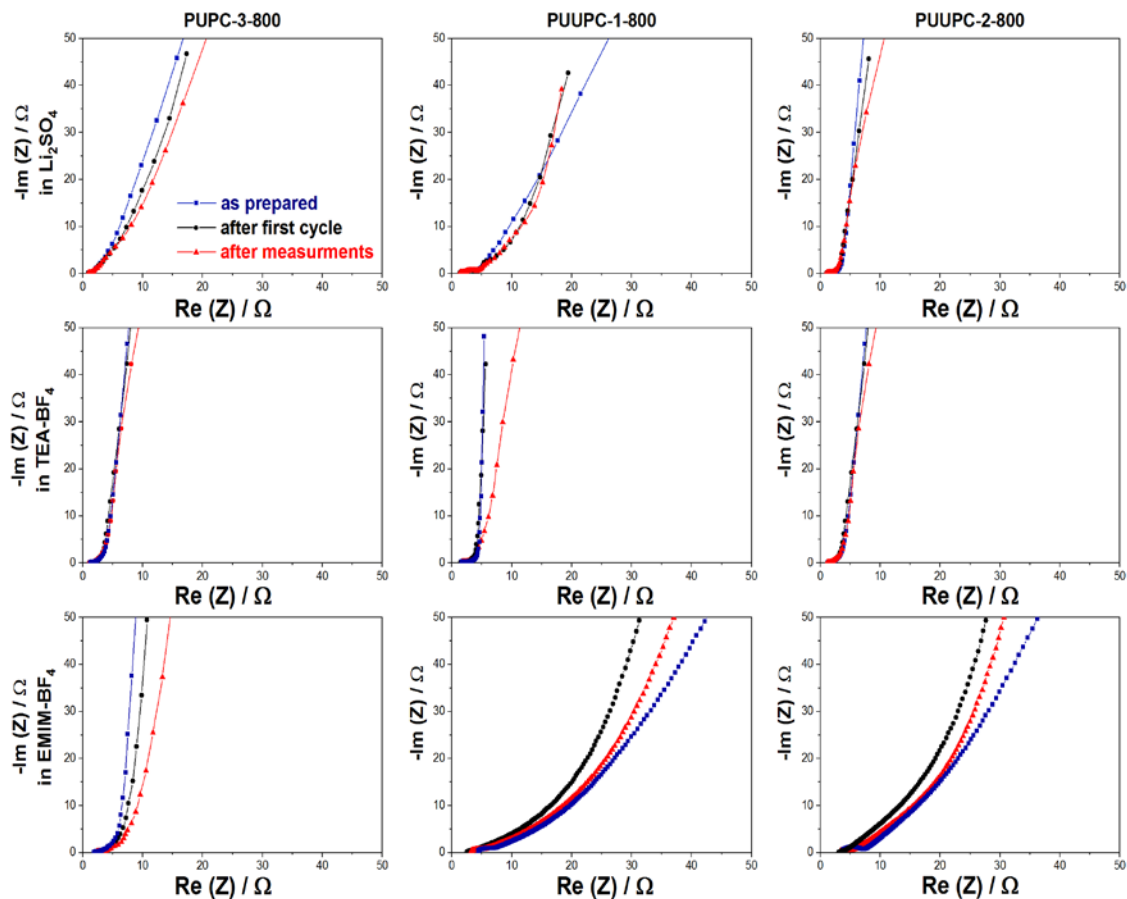

**Figure S12:** Potential electrochemical impedance spectroscopy (PEIS) matrix of samples PUPC-3-800, PUUPC-1-800, and PUUPC-2-800 measured in aqueous electrolyte  $\text{Li}_2\text{SO}_4$ , organic electrolyte  $\text{TEA-BF}_4$  in ACN and ionic electrolyte  $\text{EMIM-BF}_4$ .

### S3 Activation mechanism

Mechanism of activation with  $\text{K}_2\text{CO}_3$  according to McKee et al. [66]:

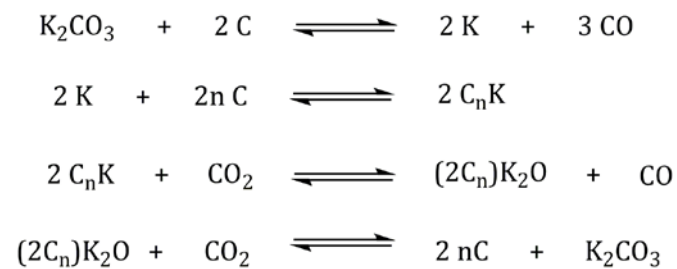

Supplement: Additional file 1 [file 2190-4286-10-157-S1.pdf]
